# Supplementary material for: Proposing a highly accurate protein structural class predictor using segmentation-based features
Source: Springer Nature journal article supplement (doi:10.1186/1471-2164-15-s1-s2), 2014-01-01

## Appendix A: Results as a function of k in k-fold cross validation

The results achieved using SVM to the SPINE-S, PSSM-S, and PSSM-SPINE-S feature vectors using 2 to 10 fold cross validation for 25PDB benchmark

Table 1: The results (%) achieved for SPINE-S feature group using 2 to 10 fold cross validation evaluation method.

| Cross validation | All - $\alpha$ | All - $\beta$ | $\alpha / \beta$ | $\alpha + \beta$ | Overall |
|------------------|----------------|---------------|------------------|------------------|---------|
| 2 folds          | 93.7           | 82.4          | 72.9             | 71.2             | 80.4    |
| 3 folds          | 93.9           | 83.0          | 75.5             | 73.2             | 81.7    |
| 4 folds          | 93.9           | 83.0          | 76.4             | 73.0             | 81.8    |
| 5 folds          | 93.8           | 83.0          | 76.5             | 73.5             | 82.0    |
| 6 folds          | 94.0           | 83.0          | 76.8             | 73.2             | 82.0    |
| 7 folds          | 94.1           | 83.1          | 76.9             | 73.2             | 82.1    |
| 8 folds          | 93.8           | 83.2          | 77.2             | 74.0             | 82.1    |
| 9 folds          | 94.1           | 83.2          | 77.3             | 73.6             | 82.2    |
| 10 folds         | 93.9           | 83.3          | 77.2             | 73.1             | 82.2    |

Table 2: The results (%) achieved for PSSM-S feature group using 2 to 10 fold cross validation evaluation method.

| Cross validation | All - $\alpha$ | All - $\beta$ | $\alpha / \beta$ | $\alpha + \beta$ | Overall |
|------------------|----------------|---------------|------------------|------------------|---------|
| 2 folds          | 92.1           | 84.6          | 89.0             | 77.1             | 86.2    |
| 3 folds          | 93.2           | 85.4          | 90.1             | 78.6             | 87.3    |
| 4 folds          | 93.2           | 86.3          | 90.1             | 78.5             | 87.5    |
| 5 folds          | 93.4           | 87.0          | 90.6             | 79.2             | 88.0    |
| 6 folds          | 93.3           | 87.9          | 90.7             | 78.6             | 88.2    |
| 7 folds          | 93.5           | 87.9          | 90.5             | 79.9             | 88.4    |
| 8 folds          | 93.7           | 87.9          | 90.7             | 79.0             | 88.3    |
| 9 folds          | 93.9           | 87.9          | 90.4             | 79.3             | 88.3    |
| 10 folds         | 93.8           | 88.1          | 90.5             | 78.9             | 88.3    |

Table 3: The results (%) achieved for PSSM-SPINE-S feature group using 2 to 10 fold cross validation evaluation method.

| Cross validation | All - $\alpha$ | All - $\beta$ | $\alpha / \beta$ | $\alpha + \beta$ | Overall |
|------------------|----------------|---------------|------------------|------------------|---------|
| 2 folds          | 96.0           | 91.1          | 87.9             | 86.0             | 90.5    |
| 3 folds          | 96.1           | 91.6          | 89.7             | 87.6             | 91.4    |
| 4 folds          | 96.3           | 92.3          | 89.5             | 87.1             | 91.6    |
| 5 folds          | 96.3           | 92.3          | 90.0             | 87.3             | 91.7    |
| 6 folds          | 96.6           | 92.8          | 89.9             | 87.0             | 91.8    |
| 7 folds          | 96.6           | 92.8          | 89.7             | 86.7             | 91.7    |
| 8 folds          | 96.6           | 93.0          | 89.8             | 86.8             | 91.8    |
| 9 folds          | 96.5           | 92.9          | 89.8             | 87.3             | 91.8    |
| 10 folds         | 96.8           | 92.8          | 90.2             | 87.3             | 92.1    |

The results achieved using SVM to the SPINE-S, PSSM-S, and PSSM-SPINE-S feature vectors using 2 to 10 fold cross validation for 1189 benchmark

Table 4: The results (%) achieved for SPINE-S feature group using 2 to 10 fold cross validation evaluation method.

| Cross validation | All - $\alpha$ | All - $\beta$ | $\alpha / \beta$ | $\alpha + \beta$ | Overall |
|------------------|----------------|---------------|------------------|------------------|---------|
| 2 folds          | 90.3           | 87.2          | 76.0             | 56.7             | 77.6    |
| 3 folds          | 90.3           | 87.2          | 78.5             | 57.4             | 78.6    |
| 4 folds          | 90.7           | 87.0          | 78.4             | 57.6             | 78.6    |
| 5 folds          | 90.6           | 87.4          | 78.3             | 57.6             | 78.7    |
| 6 folds          | 90.9           | 87.3          | 78.1             | 58.7             | 78.8    |
| 7 folds          | 90.9           | 87.6          | 78.8             | 58.3             | 79.0    |
| 8 folds          | 91.3           | 87.8          | 78.4             | 57.4             | 78.9    |
| 9 folds          | 90.8           | 87.4          | 78.8             | 57.6             | 78.9    |
| 10 folds         | 91.2           | 87.6          | 79.1             | 57.8             | 79.0    |

Table 5: The results (%) achieved for PSSM-S feature group using 2 to 10 fold cross validation evaluation method.

| Cross validation | All - $\alpha$ | All - $\beta$ | $\alpha / \beta$ | $\alpha + \beta$ | Overall |
|------------------|----------------|---------------|------------------|------------------|---------|
| 2 folds          | 89.7           | 81.1          | 74.2             | 58.2             | 75.6    |
| 3 folds          | 91.3           | 84.5          | 75.1             | 62.8             | 78.2    |
| 4 folds          | 91.0           | 84.2          | 75.8             | 61.5             | 78.0    |
| 5 folds          | 91.5           | 84.8          | 77.2             | 65.0             | 79.4    |
| 6 folds          | 92.3           | 85.4          | 77.1             | 63.7             | 79.4    |
| 7 folds          | 91.7           | 85.3          | 78.0             | 64.2             | 79.5    |
| 8 folds          | 91.5           | 85.4          | 77.2             | 65.1             | 79.4    |
| 9 folds          | 92.4           | 85.7          | 77.1             | 64.9             | 79.5    |
| 10 folds         | 92.5           | 85.6          | 77.6             | 64.2             | 79.6    |

Table 6: The results (%) achieved for PSSM-SPINE-S feature group using 2 to 10 fold cross validation evaluation method.

| Cross validation | All - $\alpha$ | All - $\beta$ | $\alpha / \beta$ | $\alpha + \beta$ | Overall |
|------------------|----------------|---------------|------------------|------------------|---------|
| 2 folds          | 95.7           | 89.1          | 77.8             | 59.6             | 80.4    |
| 3 folds          | 96.8           | 91.0          | 78.9             | 63.7             | 82.4    |
| 4 folds          | 96.7           | 91.2          | 80.5             | 65.5             | 83.3    |
| 5 folds          | 96.8           | 91.4          | 81.5             | 66.1             | 83.7    |
| 6 folds          | 97.3           | 91.6          | 80.9             | 67.9             | 84.3    |
| 7 folds          | 97.1           | 92.2          | 82.0             | 67.2             | 84.4    |
| 8 folds          | 97.6           | 91.8          | 81.9             | 67.8             | 84.6    |
| 9 folds          | 97.5           | 92.0          | 82.4             | 68.7             | 85.0    |
| 10 folds         | 97.6           | 91.9          | 83.1             | 68.7             | 85.8    |

Figure 1: Comparison of the results achieved for PSSM-S, SPINE-S (for 25PDB benchmark), and PSSM-SPINE-S using 2 to 10 fold cross validation

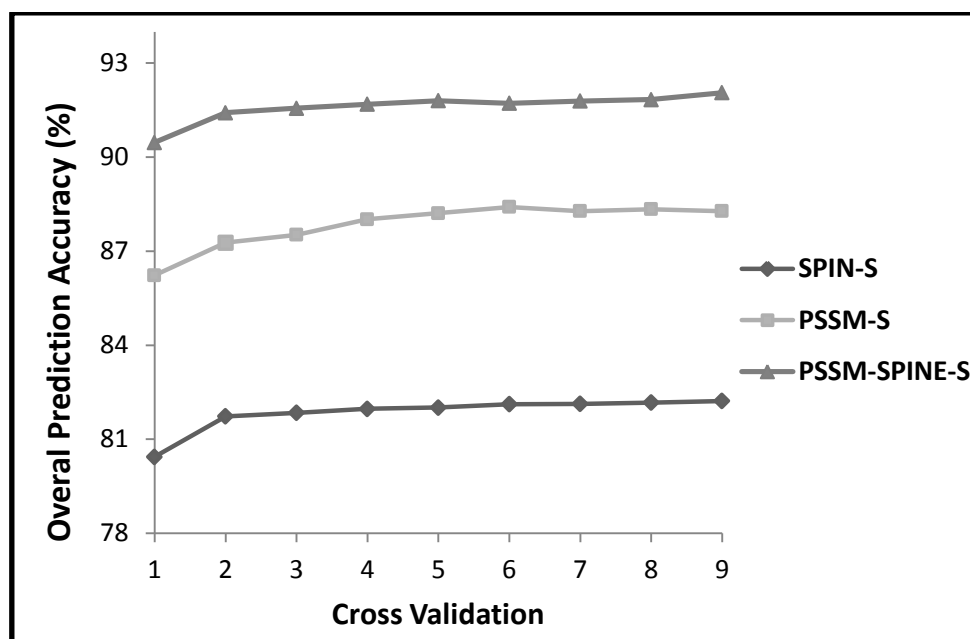

Figure 2: Comparison of the results achieved for PSSM-S, SPINE-S (for 1189 benchmark), and PSSM-SPINE-S using 2 to 10 fold cross validation

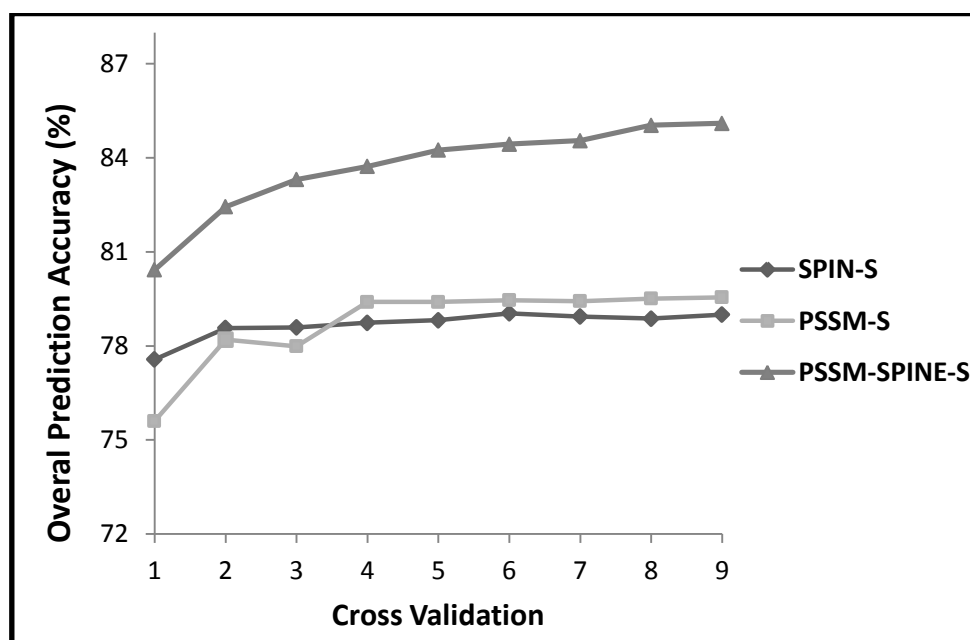

Supplement: 12864_2014_5675_MOESM1_ESM.pdf [file 12864_2014_5675_MOESM1_ESM.pdf]
